# Supplementary material for: Effects of Dipeptidyl Peptidase-4 Inhibitors on Renal Outcomes in Patients with Type 2 Diabetes: A Systematic Review and Meta-Analysis
Source: PubMed Central journal article supplement — Endocrinol Metab (Seoul). 2019 Mar 21;34(1):80–92. doi: 10.3803/EnM.2019.34.1.80 (PMC6435854; doi:10.3803/enm.2019.34.1.80), 2019-03-21
Supplement: enm-34-80-s004.pdf [file enm-34-80-s004.pdf]

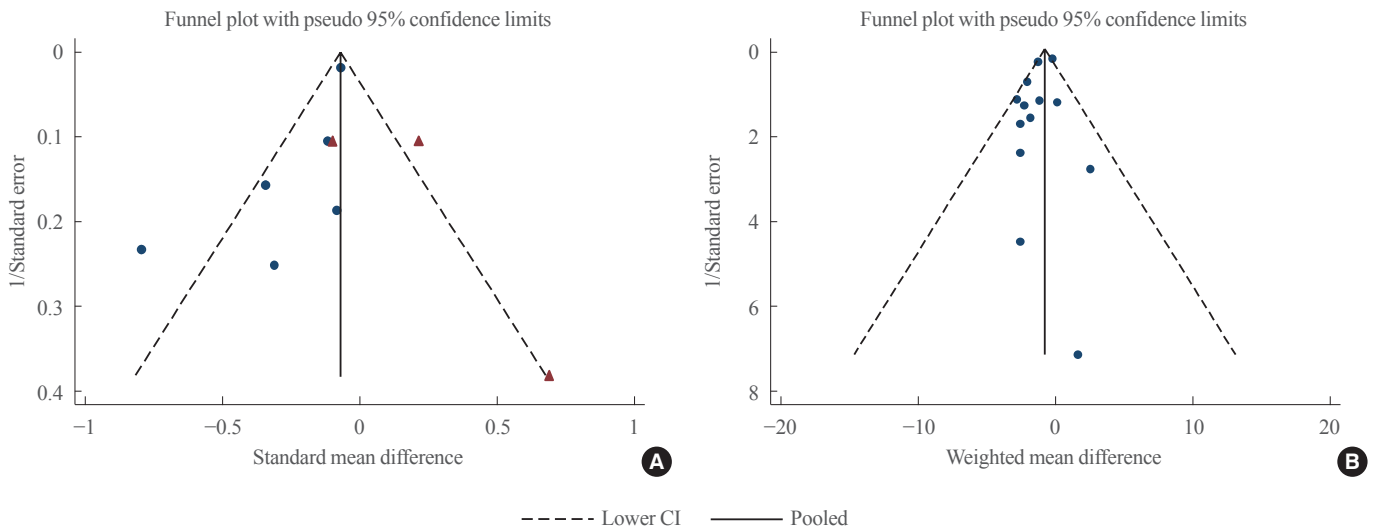

**Supplemental Fig. S2.** Funnel plots for changes in urine albumin-to-creatinine ratio and estimated glomerular filtration rates in dipeptidyl peptidase-4 inhibitors versus placebo or other antidiabetic agents. (A) Changes in urine albumin-to-creatinine ratio, ●, non-sodium-glucose cotransporter 2 inhibitors; ▲, sodium-glucose cotransporter 2 inhibitors. (B) Changes in estimated glomerular filtration rate, ●, controls; CI, confidence interval.
